# Supplementary material
Source: publisher figshare collection journal article supplement (https://frontiersin.figshare.com/ndownloader/files/34378613)
Supplement: Supplementary file [file 34378613]

## Appendix 1

Appendix 1. Correlation matrix

| variable                | 1       | 2       | 3       | 4    | 5   | 6 |
|-------------------------|---------|---------|---------|------|-----|---|
| approaches by infant    | -       |         |         |      |     |   |
| leaves by infant        | .83***  | -       |         |      |     |   |
| rejections by mother    | .44***  | .34***  | -       |      |     |   |
| restraints by mother    | -.09    | -.01    | -.17    | -    |     |   |
| grooming by mother      | -.15    | -.17*   | -.05    | .12  | -   |   |
| mutual ventral cradling | -.68*** | -.59*** | -.24*** | -.08 | .09 | - |

*Note.* Correlation matrix of the variables considered for factor analysis. \* $p < .05$ , \*\* $p < .01$ , \*\*\* $p < .001$

## Appendix 2

Table 1. Factor scores from first factor analysis

| Factor | <i>Attachment</i>       |                 |
|--------|-------------------------|-----------------|
|        | Item                    | Factor Loadings |
|        | Approaches by Infant    | .938            |
|        | Leaves by Infant        | .888            |
|        | Rejections by Mother    | .560            |
|        | Mutual Ventral Cradling | -.798           |

*Note.* The first factor analysis resulted in one emerging factor, explaining 65.49% of the variance. Based on the factor loadings, this factor was identified as *Attachment*.

Table 2. Factor scores from second factor analysis

| Factor | <i>Attachment</i>       |                 | <i>Maternal Restraints</i> |                 |
|--------|-------------------------|-----------------|----------------------------|-----------------|
|        | Item                    | Factor Loadings | Item                       | Factor Loadings |
|        | Approaches by Infant    | .976            | Restraints by Mother       | -.564           |
|        | Leaves by Infant        | .836            |                            |                 |
|        | Rejections by Mother    | .391            |                            |                 |
|        | Mutual Ventral Cradling | -.716           |                            |                 |

*Note.* The second factor analysis resulted in two emerging factors, explaining 74.65% of the variance. Based on the factor loadings after from Varimax rotation, Factor 1 was identified as *Attachment* and Factor 2 was identified as *Maternal Restraints*.
